# Supplementary material for: Global burden of prostate cancer attributable to smoking among males in 204 countries and territories, 1990–2019
Source: Springer Nature journal article supplement (doi:10.1186/s12885-023-10552-8), 2023-01-26

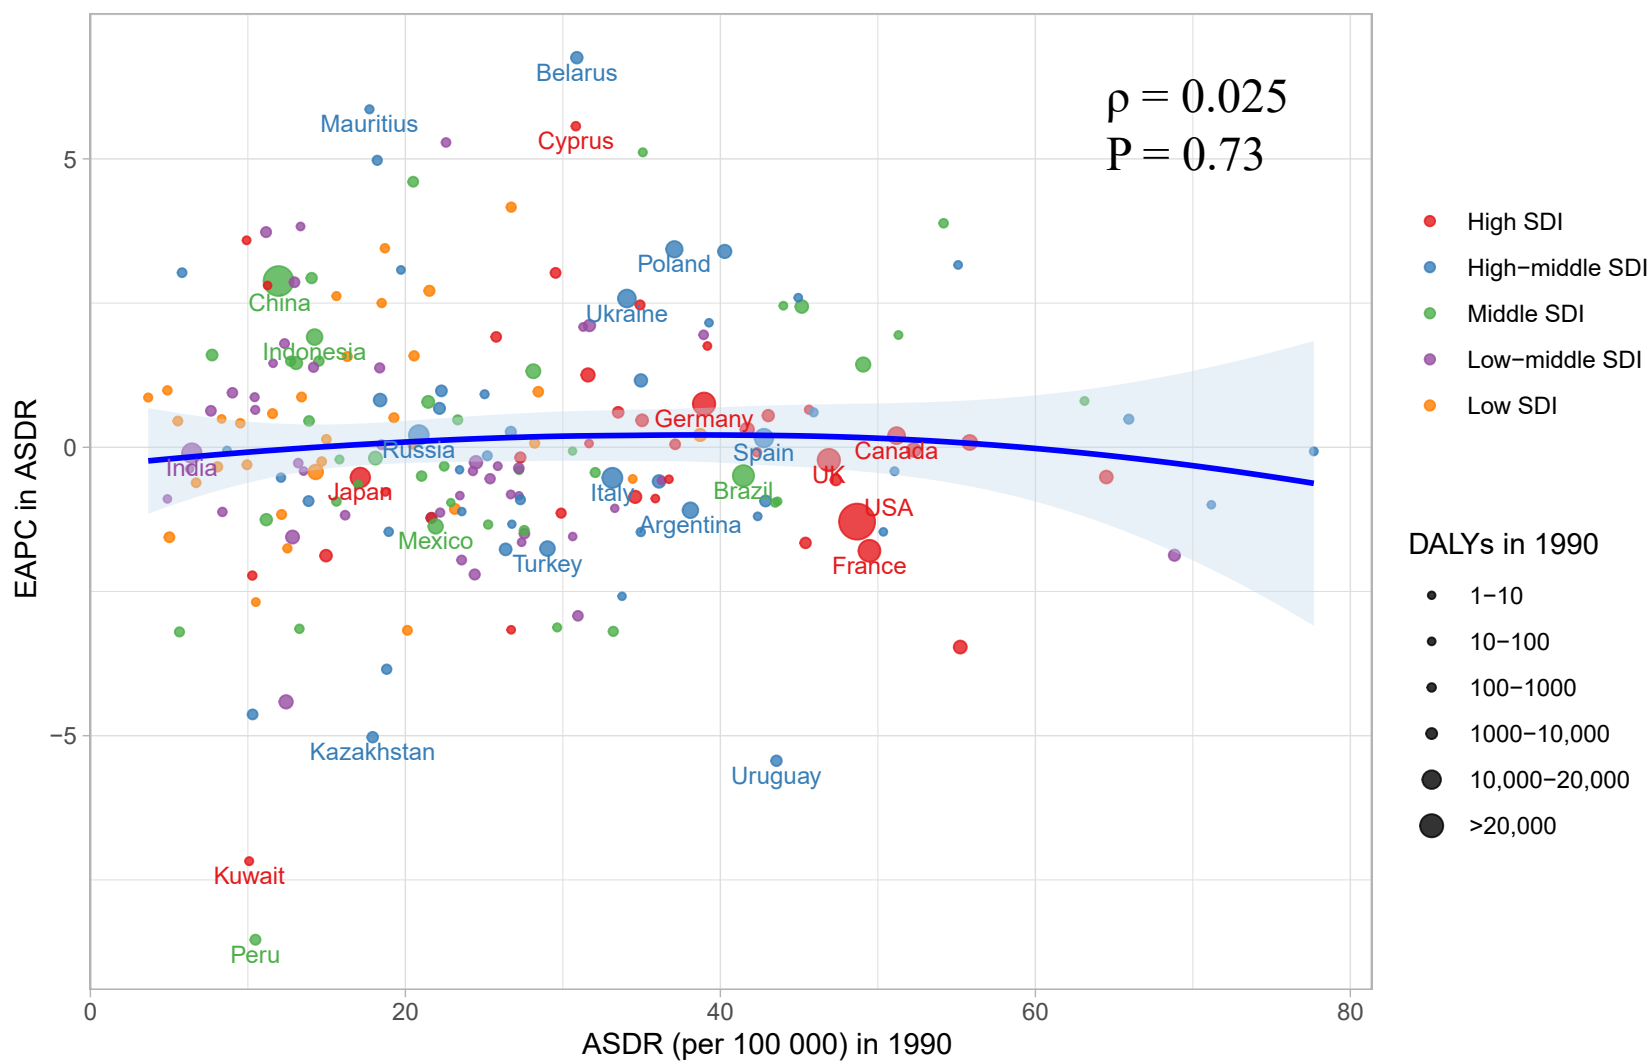

Supplement: MOESM10 [file 23958052]
